# Supplementary material for: Preparation of two different crystal structures of cerous phosphate as solid acid catalysts: their different catalytic performance in the aldol condensation reaction between furfural and acetone
Source: Royal Society of Chemistry journal article supplement (doi:10.1039/c9ra02937k), 2019-01-01
Supplement: c9ra02937k1.pdf [file c9ra02937k1.pdf]

*Preparation of two different crystal structures of cerous phosphate as solid acid  
catalysts: their different catalytic performance in aldol condensation reaction  
between furfural and acetone*

Wenzhi Li<sup>a</sup>, Mingxue Su<sup>a,\*</sup>, Tao Yang<sup>a</sup>, Tingwei Zhang<sup>a</sup>, Qiaozhi Ma<sup>b</sup>, Song Li<sup>c</sup>, Qifu Huang<sup>d</sup>

a. Laboratory of Basic Research in Biomass Conversion and Utilization,  
Department of Thermal Science and Energy Engineering, University of Science and  
Technology of China, Hefei 230026, China

b. College of Materials and Energy, South China Agricultural University,  
Guangzhou 510642, China

c. CAS Key Laboratory of Renewable Energy, Guangzhou Institute of Energy  
Conversion, Chinese Academy of Sciences, Guangzhou 510640, China

d. Beijing Mechanical Equipment Institute, Beijing, 100854, P.R. China

### Identification of the presence of F<sub>2</sub>Ac in the reaction mixture.

Reaction product F<sub>2</sub>Ac, 1,5-bis-(2-furanyl)-1,4-pentadien-3-one, was identified in the reaction medium with a GC-MS by assignation of their fragmentation patterns, although they were not contained in the reference spectral library. Fig.S1 showed the corresponding mass spectrometry fragmentation patterns of this compounds, which was according with previous literature<sup>1</sup>. Its response factors were assumed to be similar of that of FAc.<sup>1</sup>

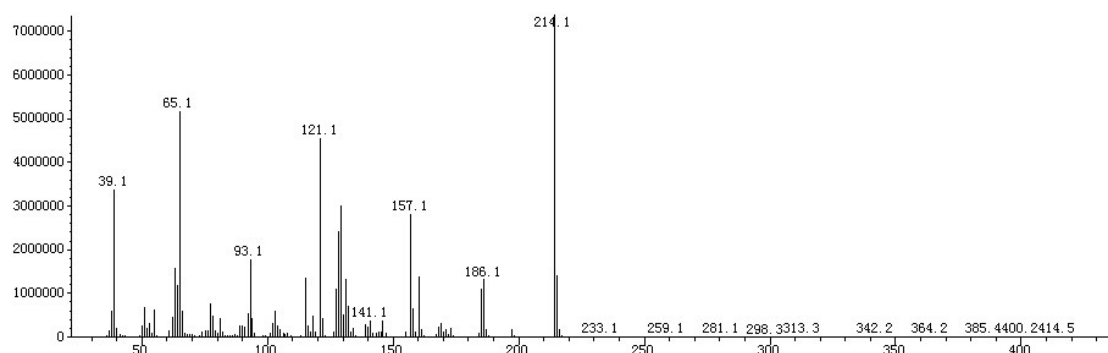

Fig.S1 MS fragmentation pattern of F<sub>2</sub>Ac.

### Reference

1 I. Sádaba, M. Ojeda, R. Mariscal, R. Richards and M. L. Granados, *Catal. Today*, 2011, 167(1), 77-83.
